# Supplementary material
Source: publisher site journal article supplement (https://www.spandidos-publications.com/2785/downloadSupplementary)

Figure S1. Effect of GASC1 inhibitor CA, NOTCH1 inhibitor DAPT and NOTCH1 overexpression on the tumorsphere formation ability of CD133<sup>+</sup> U87 or U251 glioma cells. The parental or NOTCH1-overexpressing CD133<sup>+</sup> U87 or U251 cells were cultured with CA (10  $\mu$ m) for 48 h for the tumorsphere assay. The CD133<sup>+</sup> U87 or U251 cells were also treated with CA (10  $\mu$ m) in the presence or absence of DAPT (10  $\mu$ m) for 48 h, followed by the tumorsphere assay. NOTCH1-overexpression partly abrogated the CA-induced tumorsphere formation inhibition. DAPT enhanced the suppressive effect of the GASC1 inhibitor on the tumorsphere formation of CD133<sup>+</sup> U87 or U251 cells. Data are expressed as the mean $\pm$ SD (n=3). Con, control; CA, caffeic acid; NOTCH1, notch receptor 1.

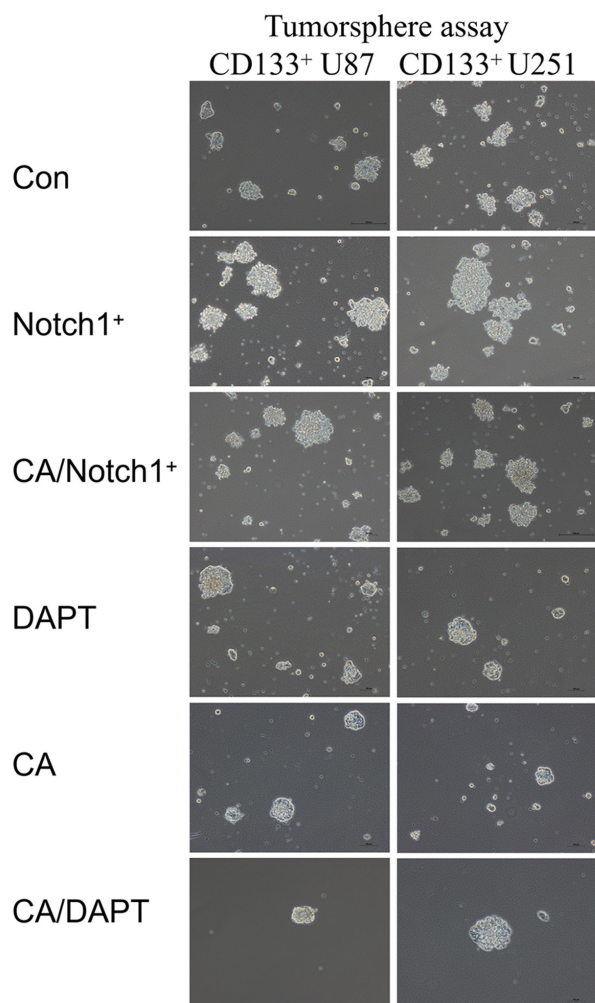

Supplement: Supplementary file 1 [file downloadSupplementary]
